# Supplementary material for: Green Synthesis of Silver Nanoparticles Using Pseudoduganella eburnea MAHUQ-39 and Their Antimicrobial Mechanisms Investigation against Drug Resistant Human Pathogens
Source: PubMed Central journal article supplement (PMC7073201; doi:10.3390/ijms21041510), 2020-02-22
Supplement: ijms-21-01510-s001.pdf [file ijms-21-01510-s001.pdf]

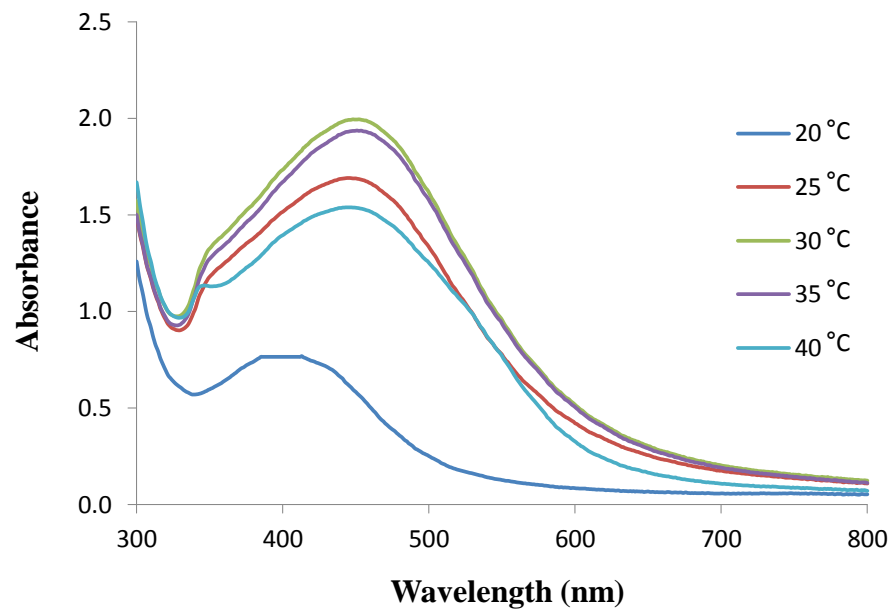

**Figure S1.** Effect of temperature on the biosynthesis of AgNPs using strain *Pseudoduganella eburnea* MAHUQ-39 was checked on the basis of UV-vis spectral analysis after 24 h of incubation with 1 mM concentration of AgNO<sub>3</sub>.

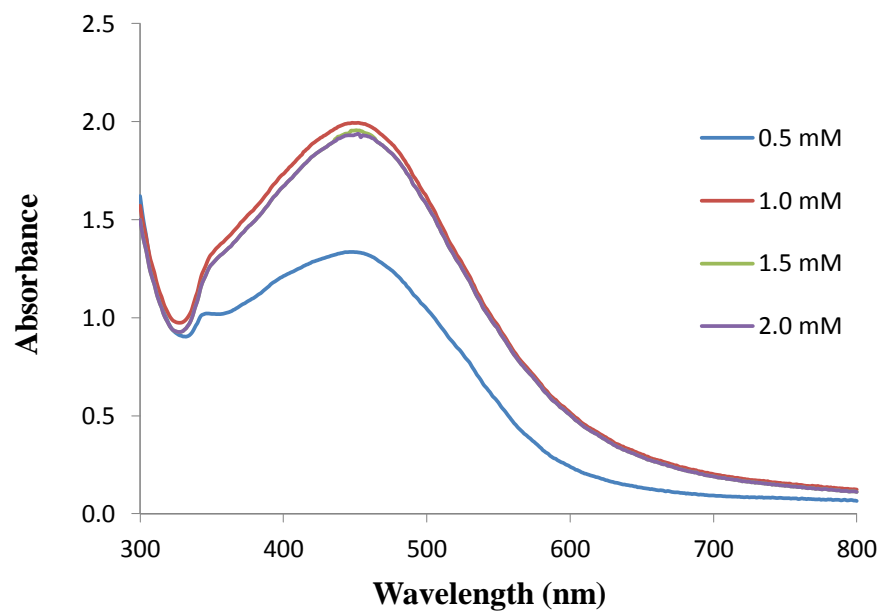

**Figure S2.** Effect of salt concentration ( $\text{AgNO}_3$ ) on the biosynthesis of AgNPs using strain *Pseudoduganella eburnea* MAHUQ-39 was checked on the basis of UV-vis spectral analysis after 24 h of incubation at 30 °C.
